# Supplementary material
Source: bioRxiv or medRxiv preprint supplement (https://www.biorxiv.org/highwire/filestream/83669/field_highwire_adjunct_files/1/272120-2.pdf)

Activator Variance over Time

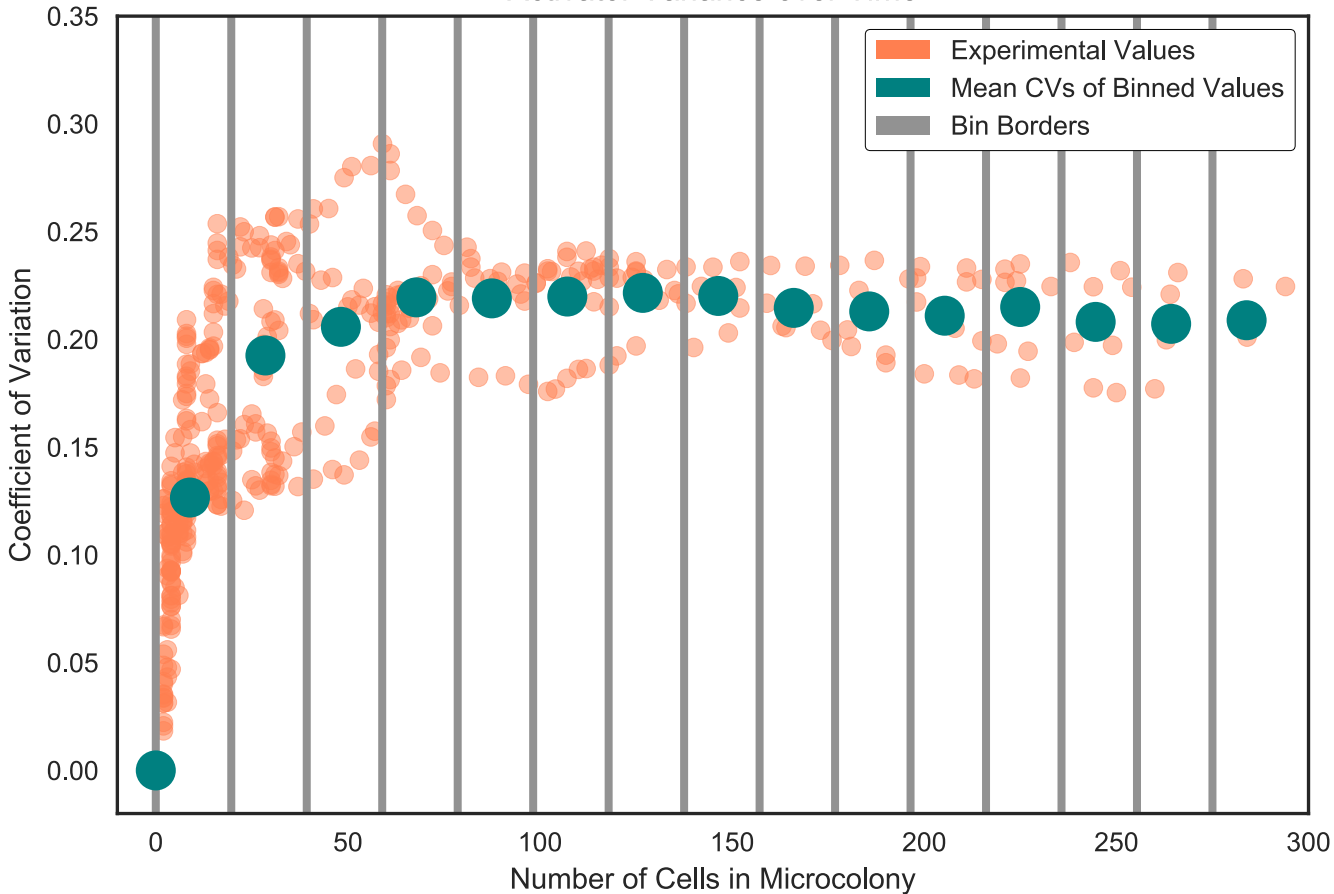

Supplement: Supplementary file [file 272120-2.pdf]
